# Supplementary material for: Assessing Redox Properties of Natural Organic Matters with regard to Electron Exchange Capacity and Redox-Active Functional Groups
Source: Hindawi journal article supplement (doi:10.1155/2020/2698213), 2020-04-14
Supplement: f1 [file 2698213.f1.pdf]

## Supporting Information

# Assessing the redox properties of natural organic matter from electron exchange capacity to redox active functional groups

Zhiyuan Xu<sup>1</sup>, Zhen Yang<sup>2</sup>, Hongping Wang<sup>1</sup>, Jie Jiang<sup>1\*</sup>

<sup>1</sup>Beijing Key Lab for Source Control Technology of Water Pollution, College of Environmental Sciences & Engineering, Beijing Forestry University, Beijing 100083, China

<sup>2</sup>Geomicrobiology, Center for Applied Geoscience, University of Tuebingen, Tuebingen, 72076, Germany

\* Address for Correspondence

Jie JIANG

Beijing Key Lab for Source Control Technology of Water Pollution

College of Environmental Sciences & Engineering

Beijing Forestry University

Beijing 100083

China

TEL & FAX: 86-10-62336615

Email: [jiangjie@bjfu.edu.cn](mailto:jiangjie@bjfu.edu.cn)

The number of Figure: 3

The number of Table: 0

The number of pages: 2 (including cover page)

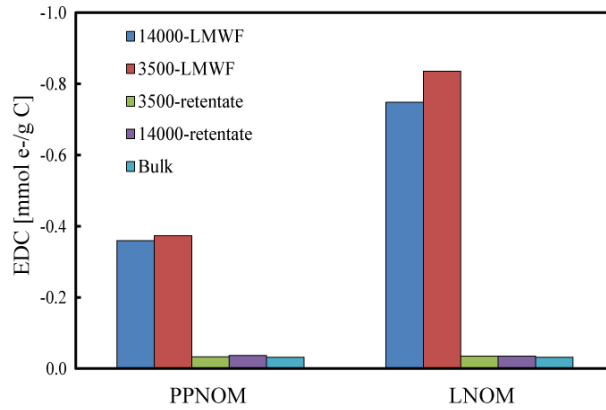

**Figure S1.** The EDC of different molecular weight fractions of PP NOM and LNOM in DEO experiments. The applied potential is +0.61 V.

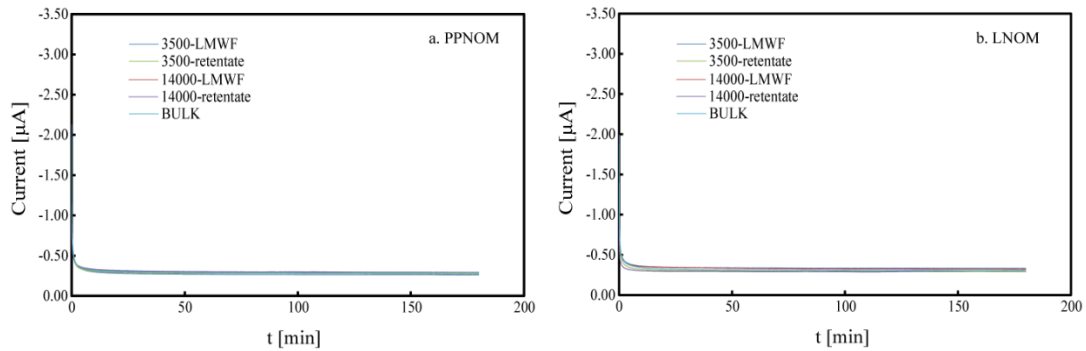

**Figure S2.** The I-t curve of different molecular weight fraction of PP NOM (a) and LNOM (b) in DEO experiments, which was carried out at +0.61 V for 3 hours.

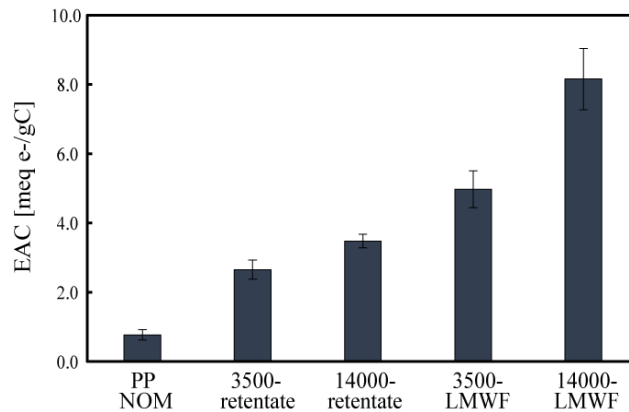

**Figure S3.** The EAC of different molecular weight fractions of PP NOM calculated by the chemical reductions.
